# Supplementary material for: Environmental Toxicant Exposure and Depressive Symptoms
Source: PubMed Central journal article supplement (PMC11222999; doi:10.1001/jamanetworkopen.2024.20259), 2024-07-03
Supplement: jamanetwopen-e2420259-s002.pdf [file jamanetwopen-e2420259-s002.pdf]

## Data Sharing Statement

Guo. Environmental Toxicant Exposure and Depressive Symptoms. *JAMA Netw Open*.  
Published July 03, 2024. doi:10.1001/jamanetworkopen.2024.20259

### Data

**Data available:** No
